# Supplementary material
Source: Research Square preprint supplement (doi:10.21203/rs.3.rs-8244855/v1)
Supplement: Supplementary file 1 [file 33b694c6895b2054308536d3.docx]

**Appendix A: regression analysis with body shame and mental health outcome**

|  | **R2 Change** | **SE** | **F** | **Df1** | **Df2** | **p** |
| --- | --- | --- | --- | --- | --- | --- |
| **Model summary** | **.036** | **159.000** | **16.025** | **5.000** | **260.000** | **<.001** |
|  |  |  |  |  |  |  |
|  | **coeff** | **se** | **t** | **p** | **LLCI** | **ULCI** |
| **Sexual identity** | **11.838** | **1.991** | **5.945** | **<.001** | **7.197** | **17.759** |
| **Age** | **-.231** | **.077** | **-3.008** | **.003** | **-.384** | **-.080** |
| **Body Shame** | **.647** | **.135** | **4.791** | **<.001** | **.381** | **.913** |
| **App type** | **19.054** | **5.931** | **3.213** | **.002** | **7.374** | **30.734** |
| **Shame x App type** | **-.621** | **-3.509** | **-3.509** | **<.001** | **-.970** | **-.273** |

**Outcome variable: Mental Health**

**Appendix C: regression analysis with body shame and self-esteem outcome**

|  | **R2 Change** | **SE** | **F** | **Df1** | **Df2** | **p** |
| --- | --- | --- | --- | --- | --- | --- |
| **Model summary** | **.033** | **36.739** | **12.216** | **5.000** | **260.000** | **<.001** |
|  |  |  |  |  |  |  |
|  | **coeff** | **se** | **t** | **p** | **LLCI** | **ULCI** |
| **Sexual identity** | **-2.981** | **.957** | **-3.062** | **.002** | **-4.823** | **-1.053** |
| **Age** | **-.059** | **.037** | **-1.374** | **.171** | **-.123** | **.022** |
| **Body Shame** | **-.224** | **.065** | **-3.452** | **<.001** | **-.352** | **-.096** |
| **App type** | **-10.303** | **2.581** | **-3.613** | **<.001** | **-15.912** | **-4.689** |
| **Shame x App type** | **.275** | **.085** | **3.233** | **.001** | **.107** | **.443** |

**Outcome variable: self esteem**

**Appendix C: regression analysis with self-surveillance and mental health outcome**

|  | **R2 Change** | **SE** | **F** | **Df1** | **Df2** | **p** |
| --- | --- | --- | --- | --- | --- | --- |
| **Model summary** | **.1527** | **38.4435** | **9.3690** | **5.000** | **260.000** | **.001** |
|  |  |  |  |  |  |  |
|  | **coeff** | **se** | **t** | **p** | **LLCI** | **ULCI** |
| **Sexual identity** | **-3.3701** | **.9782** | **-1.4881** | **<.001** | **-5.2973** | **-1.4429** |
| **Age** | **-.0558** | **.0375** | **-1.4489** | **.137** | **-.1296** | **.0180** |
| **Self-surveillance** | **-.5091** | **.0620** | **-.8210** | **.412** | **-.1731** | **.0712** |
| **App type** | **-3.6054** | **2.385** | **-1.158** | **.247** | **-9.275** | **2.5214** |
| **Shame x App type** | **.0581** | **.0872** | **.6664** | **.506** | **-.1136** | **.2298** |

**Outcome variable: Mental Health**

**Appendix D: regression analysis with self-surveillance and mental health outcome**

|  | **R2 Change** | **SE** | **F** | **Df1** | **Df2** | **p** |
| --- | --- | --- | --- | --- | --- | --- |
| **Model summary** | **.1705** | **172.5379** | **10.6879** | **5.000** | **260.000** | **<.001** |
|  |  |  |  |  |  |  |
|  | **coeff** | **se** | **t** | **p** | **LLCI** | **ULCI** |
| **Sexual identity** | **12.9439** | **2.0734** | **6.2429** | **<.001** | **8.8611** | **17.0267** |
| **Age** | **-.2322** | **.0794** | **-2.9238** | **.003** | **-.3887** | **-.0756** |
| **Self-surveillance** | **.0956** | **.1314** | **.7278** | **.467** | **-.1631** | **.3544** |
| **App type** | **.4196** | **6.5916** | **.0637** | **.949** | **-12.504** | **13.3994** |
| **Shame x App type** | **-.0291** | **1.847** | **-.1576** | **.874** | **-.3928** | **.3346** |

**Outcome variable: Mental Health**
